# Supplementary material for: Hydrogen bond-directed assembly of silsesquioxanes cubes: synthesis of carboxylic acid POSS derivatives and the solid state structure of octa[2-(p-carboxyphenyl)ethyl] silsesquioxane
Source: Royal Society of Chemistry journal article supplement (doi:10.1039/c6ce02369j), 2016-12-13
Supplement: c6ce02369j1.pdf [file c6ce02369j1.pdf]

# Hydrogen Bond-Directed Assembly of Silsesquioxanes Cubes: Synthesis of Carboxylic Acid POSS Derivatives and the Solid State Structure of Octa[2-(p-carboxyphenyl)ethyl] Silsesquioxane

Voisin Doria, Flot David, Van der Lee Arie, Dautel Olivier and Moreau Joel J. E.

## Supporting Information

### Table of contents

|                                                                                                                                         |   |
|-----------------------------------------------------------------------------------------------------------------------------------------|---|
| Figure S1. ATR - FTIR spectrum of Octa[2-(p-benzyloxycarbonylphenyl)ethenyl] silsesquioxane                                             | 3 |
| Figure S2. <sup>1</sup> H NMR spectrum of Octa[2-(p-benzyloxycarbonylphenyl)ethenyl] silsesquioxane in CDCl <sub>3</sub> .              | 4 |
| Figure S3. <sup>13</sup> C NMR spectrum of spectrum of Octa[2-(p-benzyloxycarbonylphenyl)ethenyl] silsesquioxane in CDCl <sub>3</sub> . | 4 |
| Figure S4. <sup>29</sup> Si NMR spectrum of Octa[2-(p-benzyloxycarbonylphenyl)ethenyl] silsesquioxane in CDCl <sub>3</sub> .            | 4 |
| Figure S5. ATR - FTIR spectrum of Octa[2-(p-carboxyphenyl)ethyl] silsesquioxane                                                         | 5 |
| Figure S6. <sup>1</sup> H NMR spectrum of Octa[2-(p-carboxyphenyl)ethyl] silsesquioxane in DMSO-d <sub>6</sub> .                        | 5 |
| Figure S7. <sup>13</sup> C NMR spectrum of spectrum of Octa[2-(p-carboxyphenyl)ethyl] silsesquioxane in DMSO-d <sub>6</sub> .           | 6 |
| Figure S8. <sup>29</sup> Si NMR spectrum of Octa[2-(p-carboxyphenyl)ethyl] silsesquioxane in DMSO-d <sub>6</sub> .                      | 6 |
| Figure S9. ATR - FTIR spectrum of Octa[2-(4-benzyloxycarbonyl-1,1'-biphenyl)ethenyl] silsesquioxane                                     | 7 |
| Figure S10. <sup>1</sup> H NMR spectrum of Octa[2-(4-benzyloxycarbonyl-1,1'-biphenyl)ethenyl] silsesquioxane in CDCl <sub>3</sub> .     | 7 |
| Figure S11. <sup>13</sup> C NMR spectrum of Octa[2-(4-benzyloxycarbonyl-1,1'-biphenyl)ethenyl] silsesquioxane in CDCl <sub>3</sub> .    | 8 |

|                                                                                                                                               |    |
|-----------------------------------------------------------------------------------------------------------------------------------------------|----|
| Figure S12. <sup>29</sup> Si NMR spectrum of Octa[2-(4-benzyloxycarbonyl-1,1'-biphenyl)ethenyl] silsesquioxane in CDCl <sub>3</sub> .         | 8  |
| Figure S13. ATR - FTIR spectrum of Octa[2-(4-carboxy-1,1'-biphenyl)ethyl] silsesquioxane.                                                     | 9  |
| Figure S14. <sup>1</sup> H NMR spectrum of Octa[2-(4-carboxy-1,1'-biphenyl)ethyl] silsesquioxane in DMSO-d <sub>6</sub> .                     | 9  |
| Figure S15. <sup>13</sup> C NMR spectrum of Octa[2-(4-carboxy-1,1'-biphenyl)ethyl] silsesquioxane in DMSO-d <sub>6</sub> .                    | 10 |
| Figure S16. <sup>29</sup> Si NMR spectrum of Octa[2-(4-carboxy-1,1'-biphenyl)ethyl] silsesquioxane in DMSO-d <sub>6</sub> .                   | 10 |
| Figure S17. Comparison between ATR - FTIR spectra of Octa[2-(4-carboxy-1,1'-biphenyl)ethyl] silsesquioxane and the corresponding sodium salt. | 11 |
| Figure S18. <sup>1</sup> H NMR of spectrum of sodium octa[2-(p-carboxylatephenyl)ethyl] silsesquioxane in D <sub>2</sub> O.                   | 11 |
| Figure S19. MALDY-TOF mass spectroscopy spectrum in positive ionisation of Octa[2-(p-benzyloxycarbonylphenyl)ethenyl] silsesquioxane.         | 12 |
| Figure S20. Maldy spectrum in positive ionisation of Octa[2-(p-carboxyphenyl)ethyl] silsesquioxane.                                           | 13 |
| Figure S21. MALDY-TOF mass spectroscopy spectrum in negative ionisation of Octa[2-(p-carboxyphenyl)ethyl] silsesquioxane.                     | 14 |
| Figure S22. MALDY-TOF mass spectroscopy spectrum in negative ionisation of Octa[2-(4-carboxy-1,1'-biphenyl)ethyl] silsesquioxane.             | 15 |
| Figure S23. MALDY-TOF mass spectroscopy spectrum of sodium octa[2-(p-carboxylatephenyl)ethyl] silsesquioxane.                                 | 16 |

## Experimental Details:

General: Nuclear magnetic resonance spectra (NMR) were recorded on a Bruker 400 MHz in deuterated chloroform or DMSO. MS spectra were obtained on a Synapt G2-S from Waters with a quadrupole cell collision. IR spectra were done with a Spectrum 100 FT-IR spectrometer from Perkin Elmer.

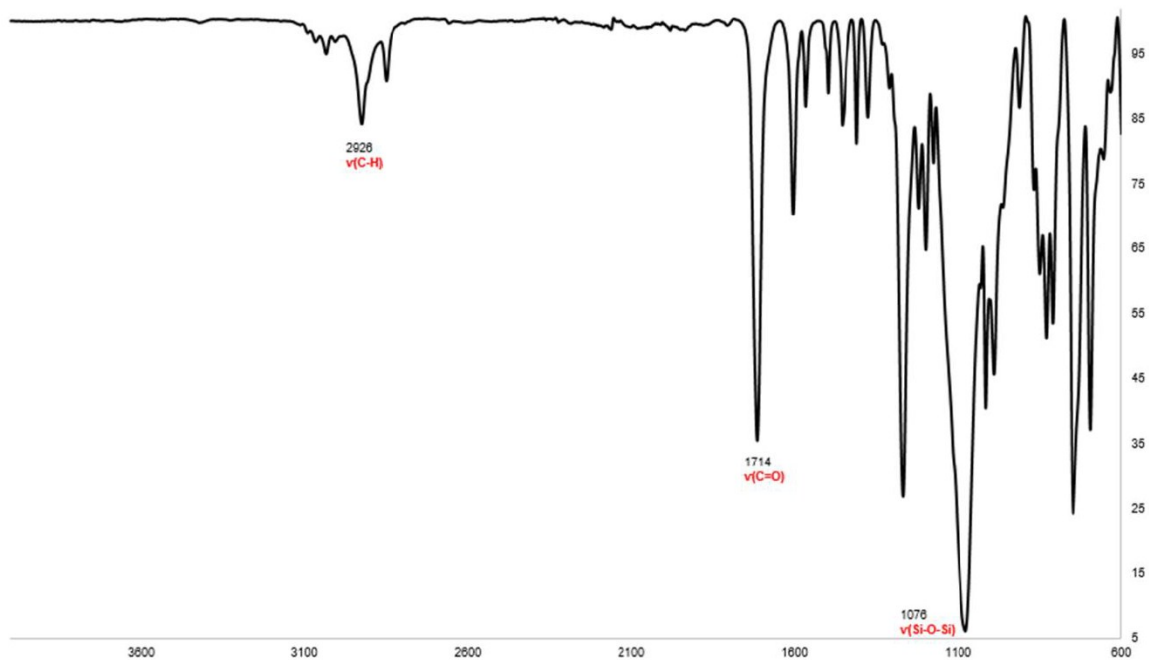

Figure S1. ATR - FTIR spectrum of **Octa[2-(p-benzyloxycarbonylphenyl)ethenyl] silsesquioxane**

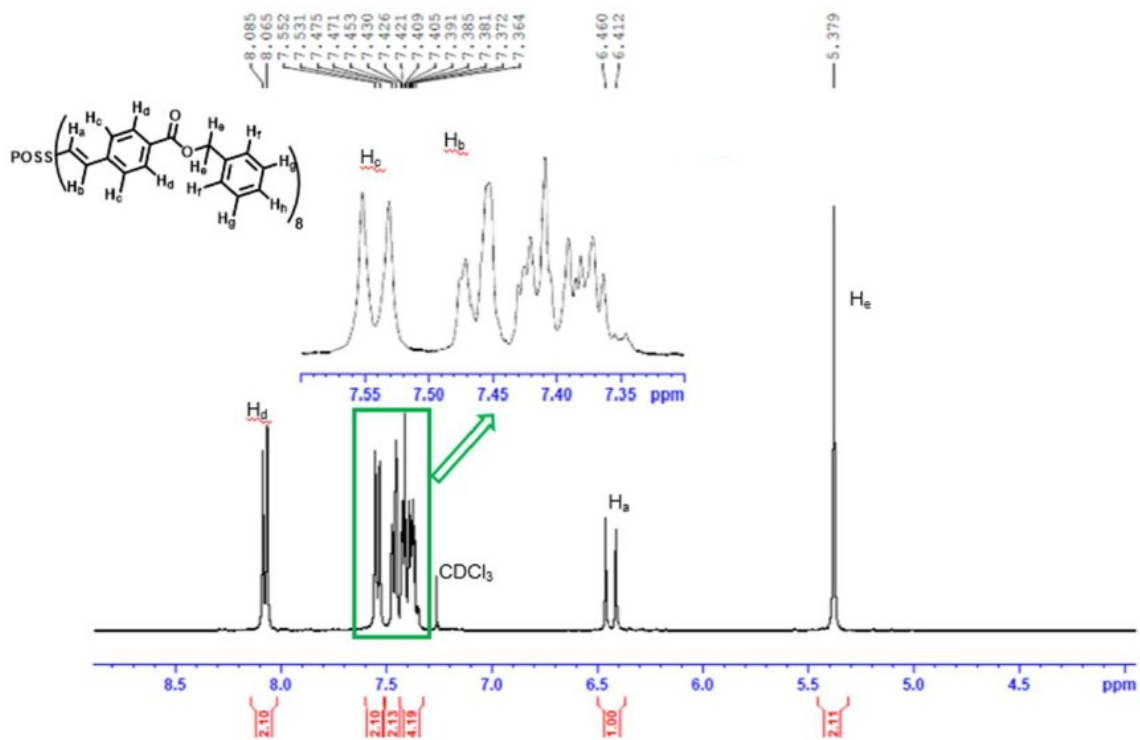

Figure S2.  $^1\text{H}$  NMR spectrum of **Octa[2-(p-benzyloxycarbonylphenyl)ethenyl] silsesquioxane** in  $\text{CDCl}_3$ .

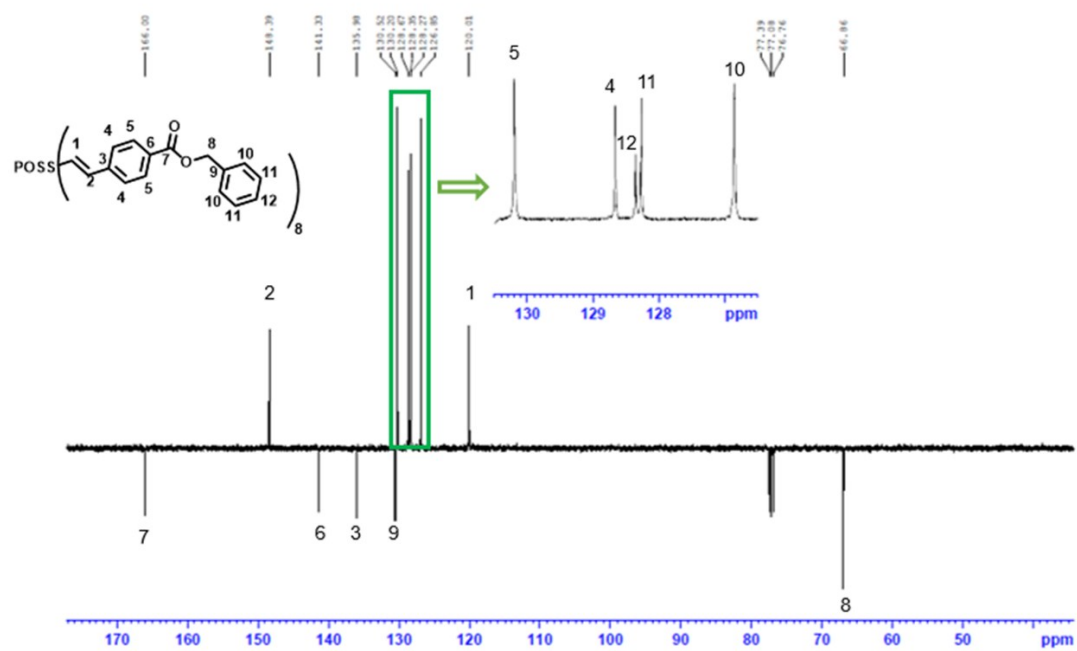

**Figure S3.**  $^{13}\text{C}$  NMR spectrum of Octa[2-(p-benzyloxycarbonylphenyl)ethenyl] silsesquioxane in  $\text{CDCl}_3$ .

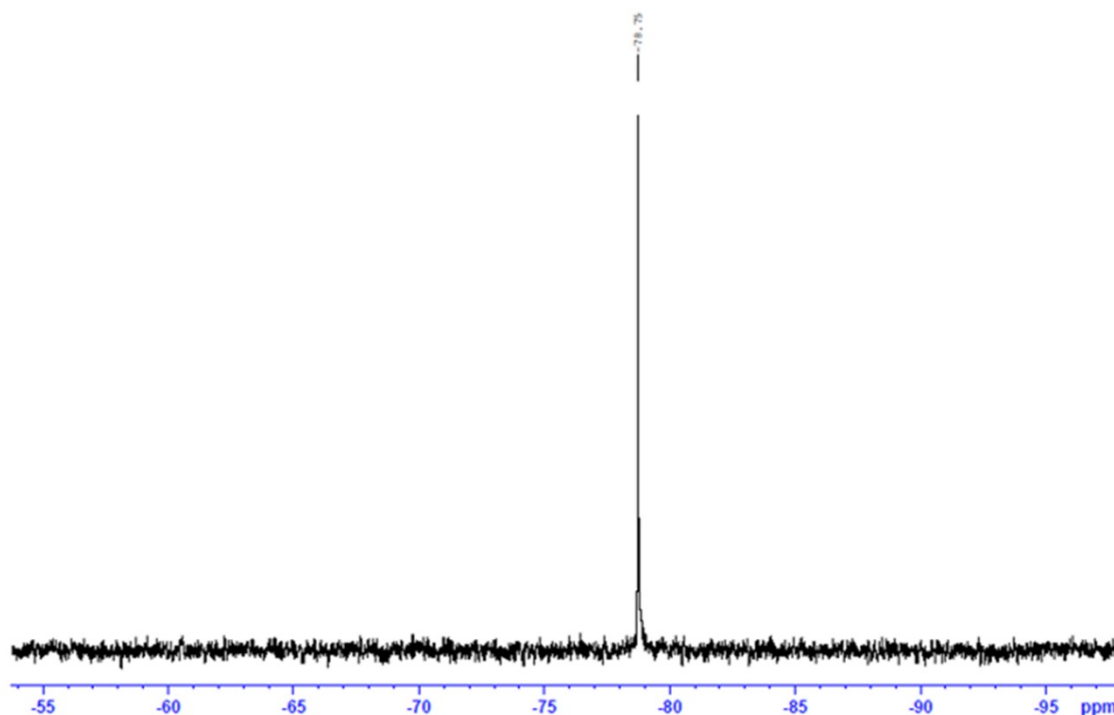

**Figure S4.**  $^{29}\text{Si}$  NMR spectrum of Octa[2-(p-benzyloxycarbonylphenyl)ethenyl] silsesquioxane in  $\text{CDCl}_3$ .

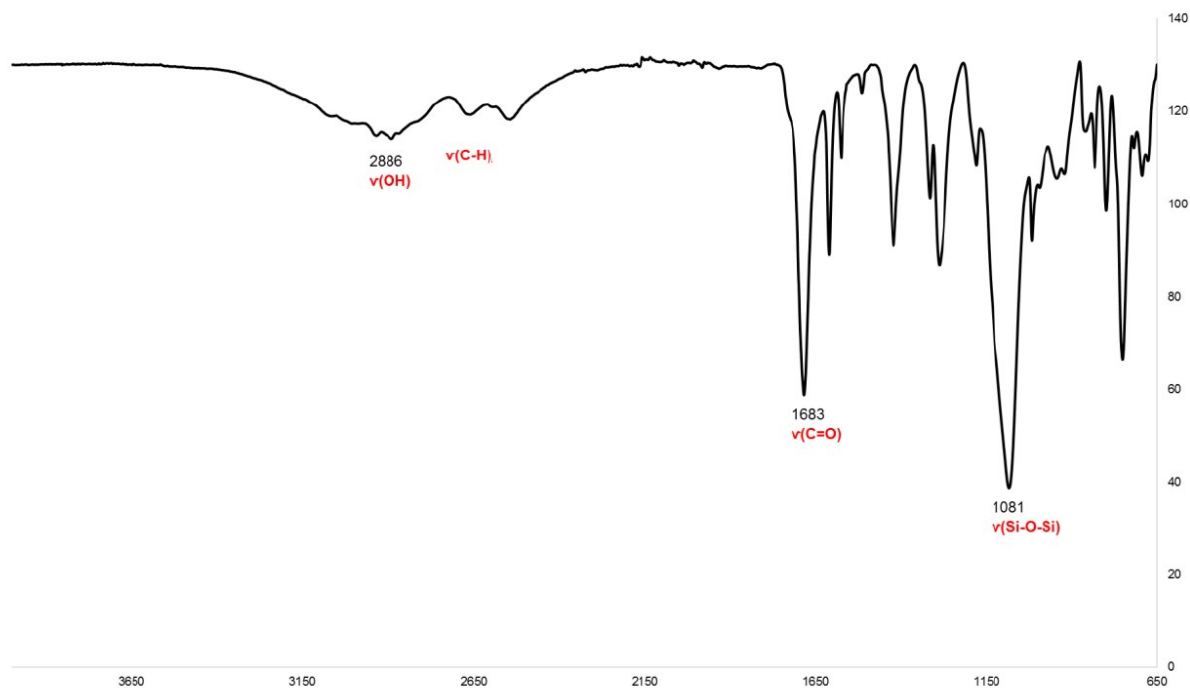

**Figure S5.** ATR - FTIR spectrum of **Octa[2-(p-carboxyphenyl)ethyl] silsesquioxane**

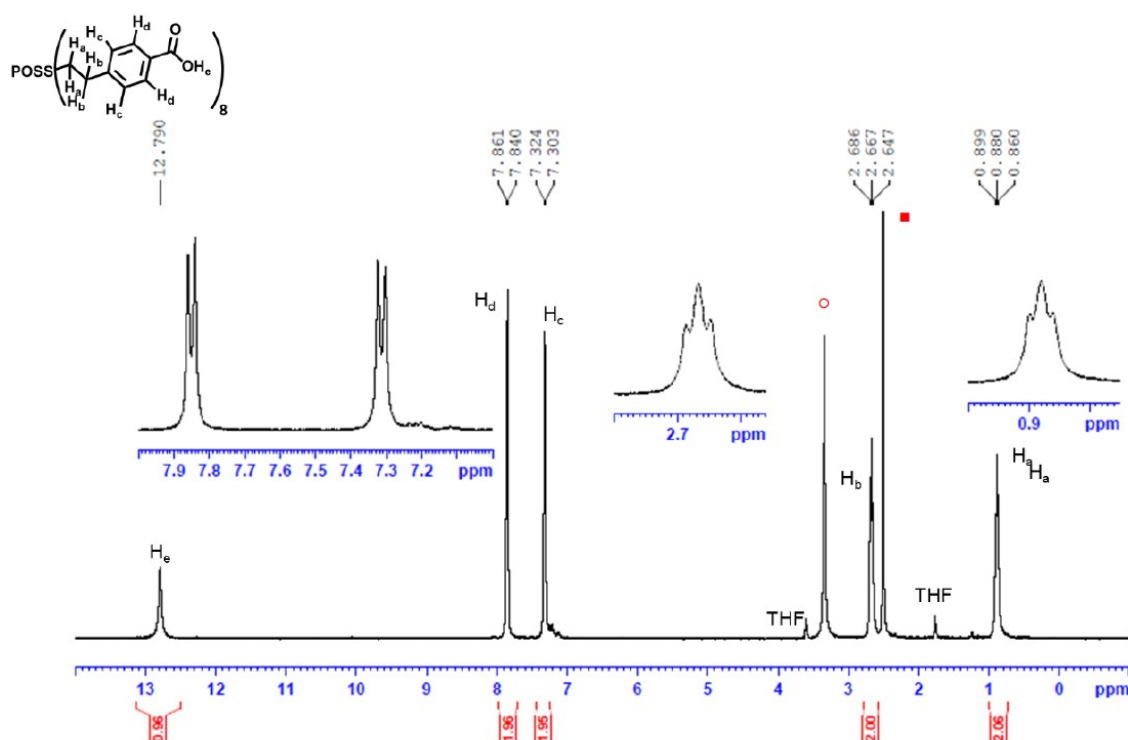

**Figure S6.**  $^1\text{H}$  NMR spectrum of **Octa[2-(p-carboxyphenyl)ethyl] silsesquioxane** in  $\text{DMSO-d}_6$ . ■DMSO, ○ $\text{H}_2\text{O}$

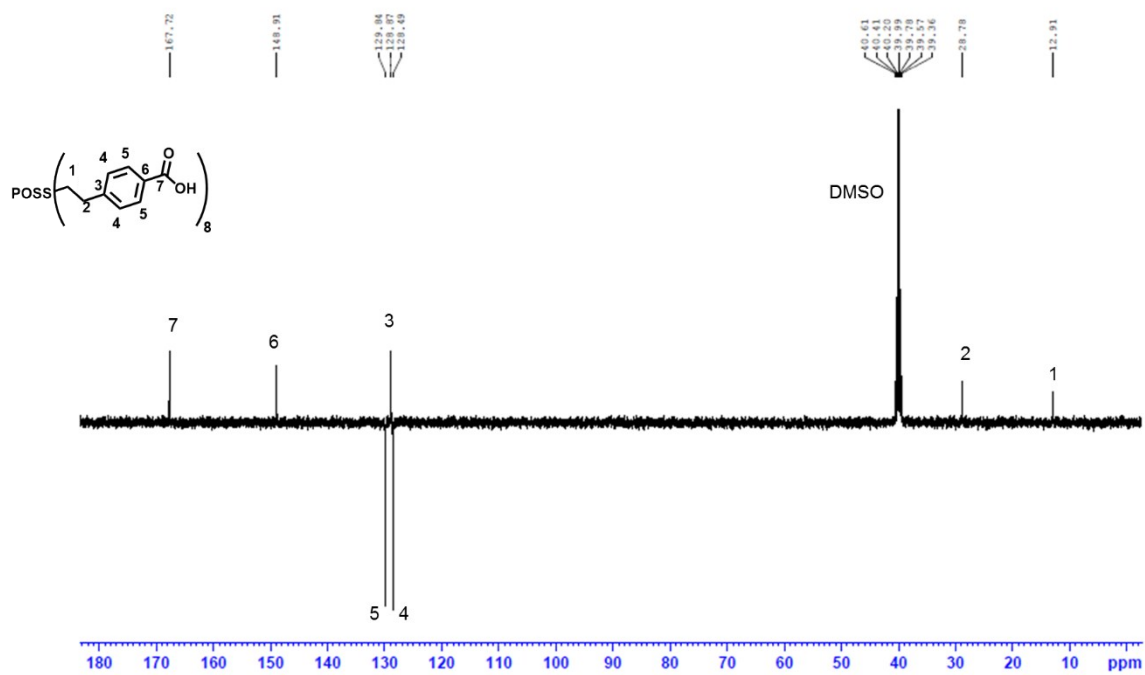

**Figure S7.** <sup>13</sup>C NMR spectrum of Octa[2-(p-carboxyphenyl)ethyl] silsesquioxane in DMSO-d<sub>6</sub>.

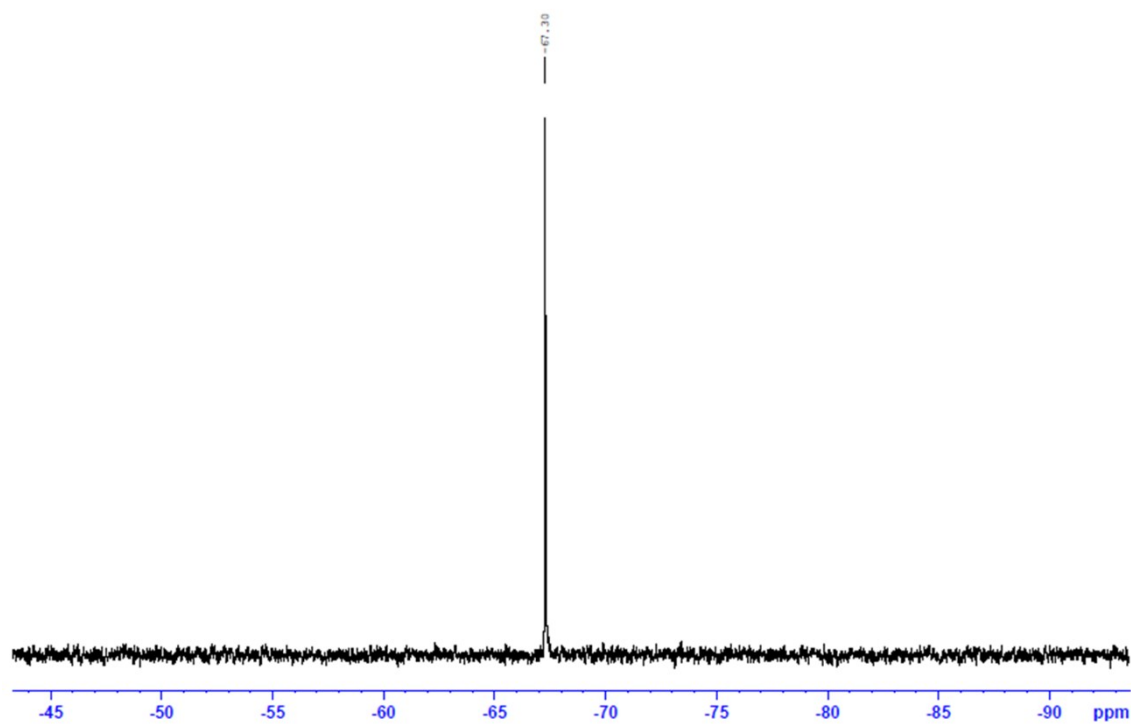

**Figure S8.** <sup>29</sup>Si NMR spectrum of Octa[2-(p-carboxyphenyl)ethyl] silsesquioxane in DMSO-d<sub>6</sub>.

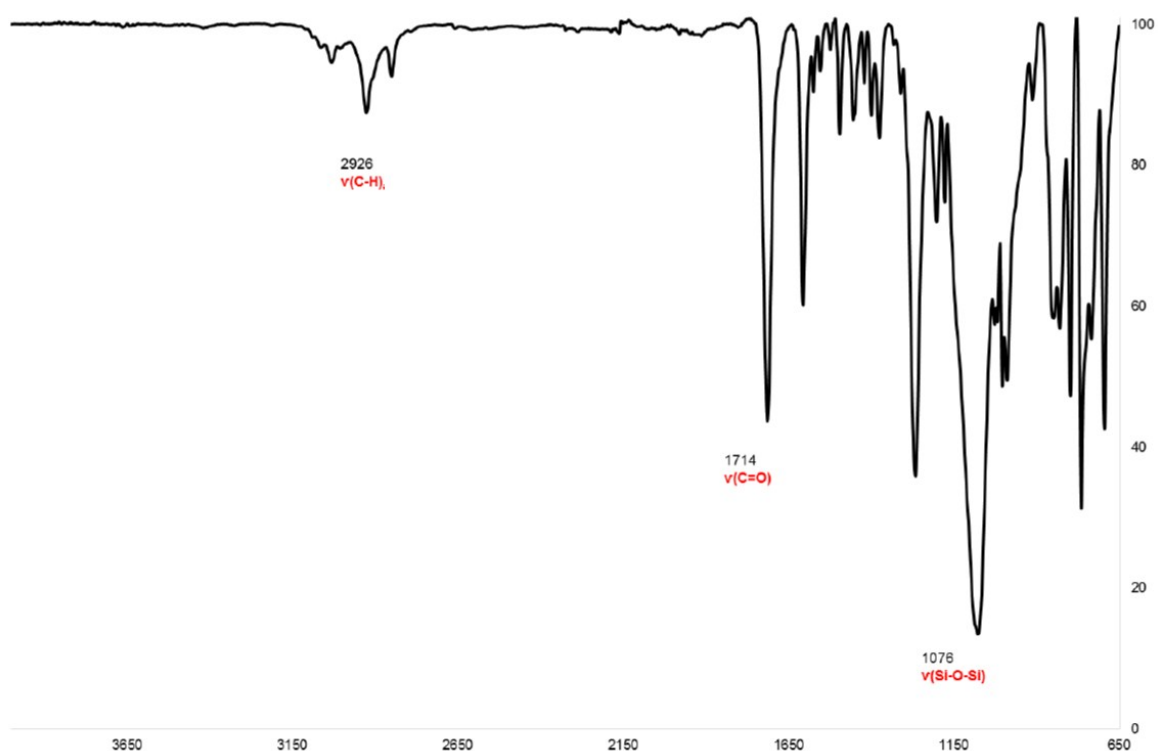

**Figure S9.** ATR - FTIR spectrum of Octa[2-(4-benzyloxycarbonyl-1,1'-biphenyl) ethenyl] silsesquioxane

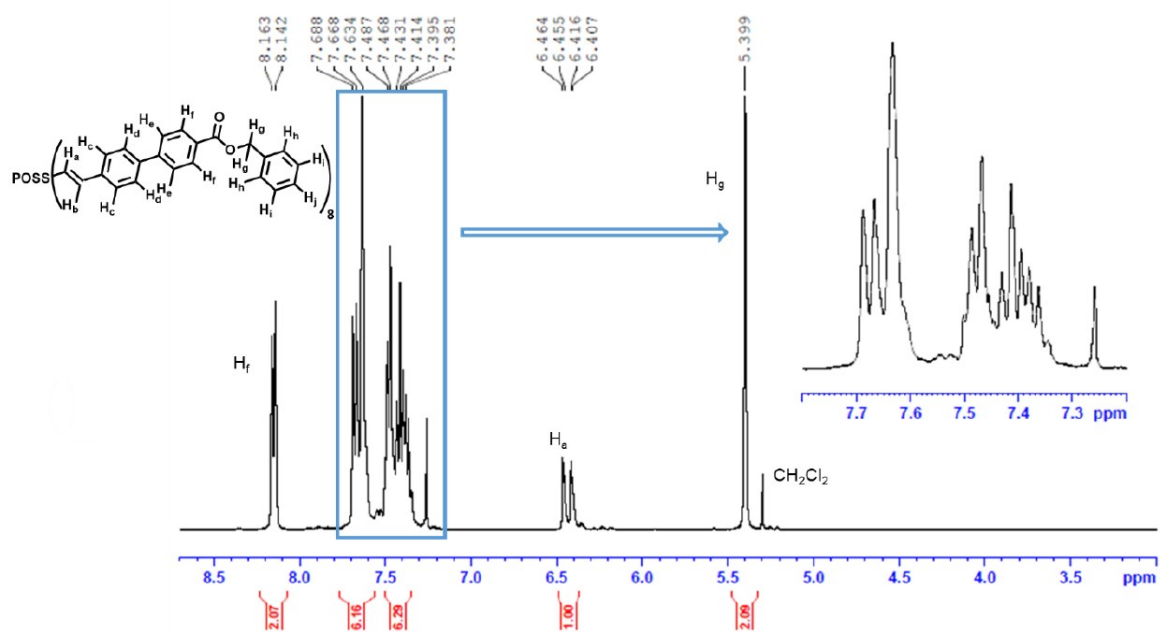

**Figure S10.**  $^1\text{H}$  NMR spectrum of Octa[2-(4-benzyloxycarbonyl-1,1'-biphenyl) ethenyl] silsesquioxane in  $\text{CDCl}_3$ .

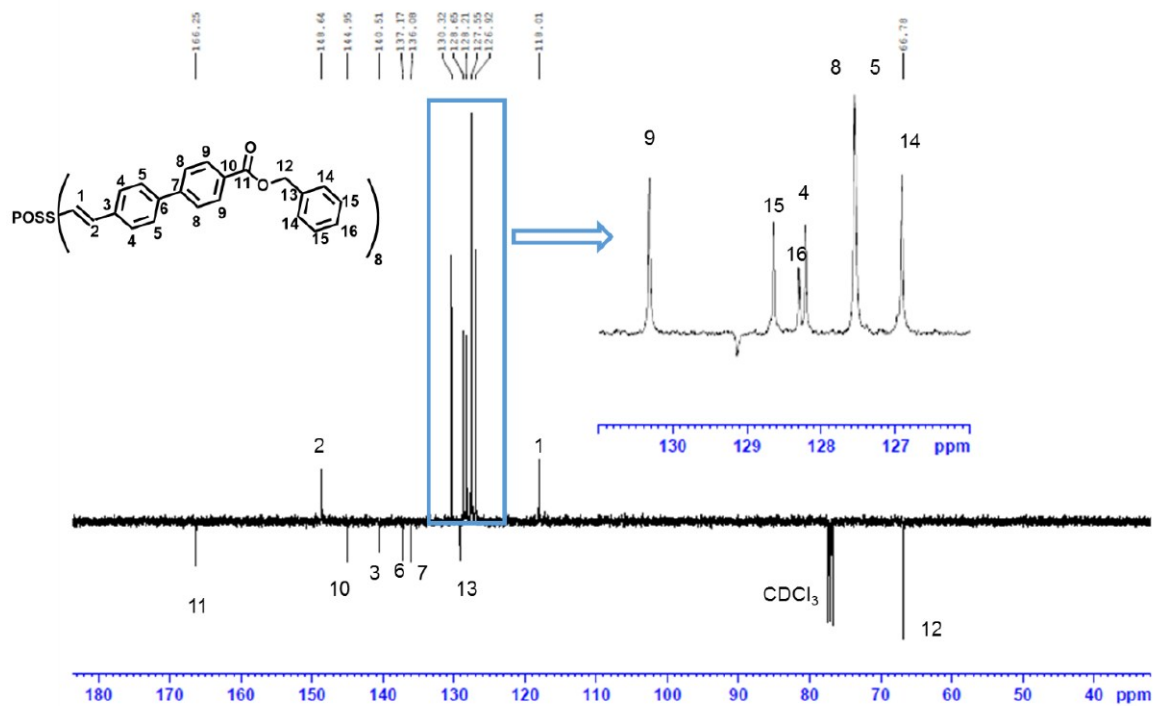

**Figure S11.** <sup>13</sup>C NMR spectrum of Octa[2-(4-benzyloxycarbonyl-1,1'-biphenyl) ethenyl] silsesquioxane in CDCl<sub>3</sub>.

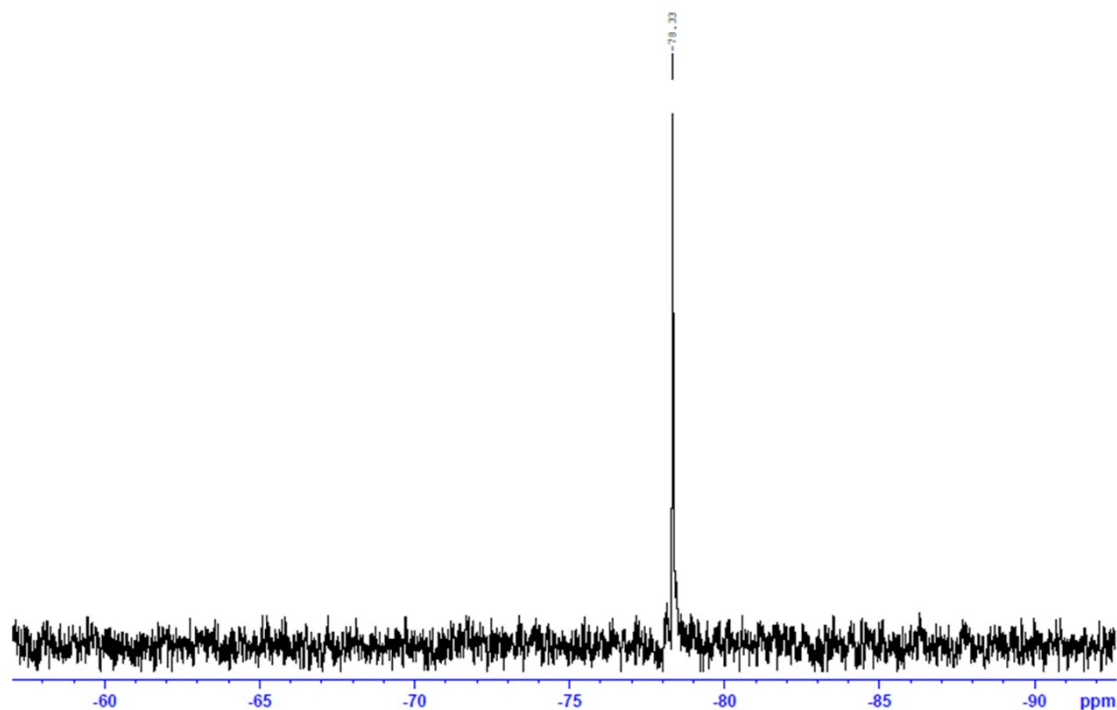

**Figure S12.** <sup>29</sup>Si NMR spectrum of Octa[2-(4-benzyloxycarbonyl-1,1'-biphenyl) ethenyl] silsesquioxane in CDCl<sub>3</sub>.



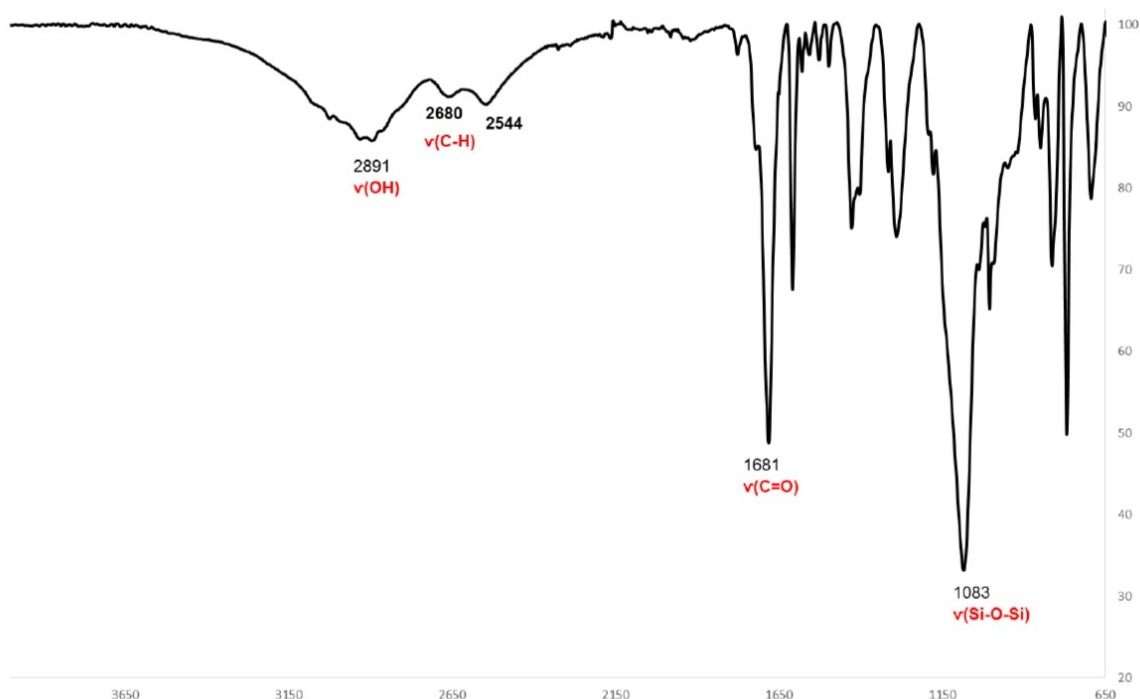

Figure S13. ATR - FTIR spectrum of **Octa[2-(4-carboxy-1,1'-biphenyl)ethyl] silsesquioxane**.

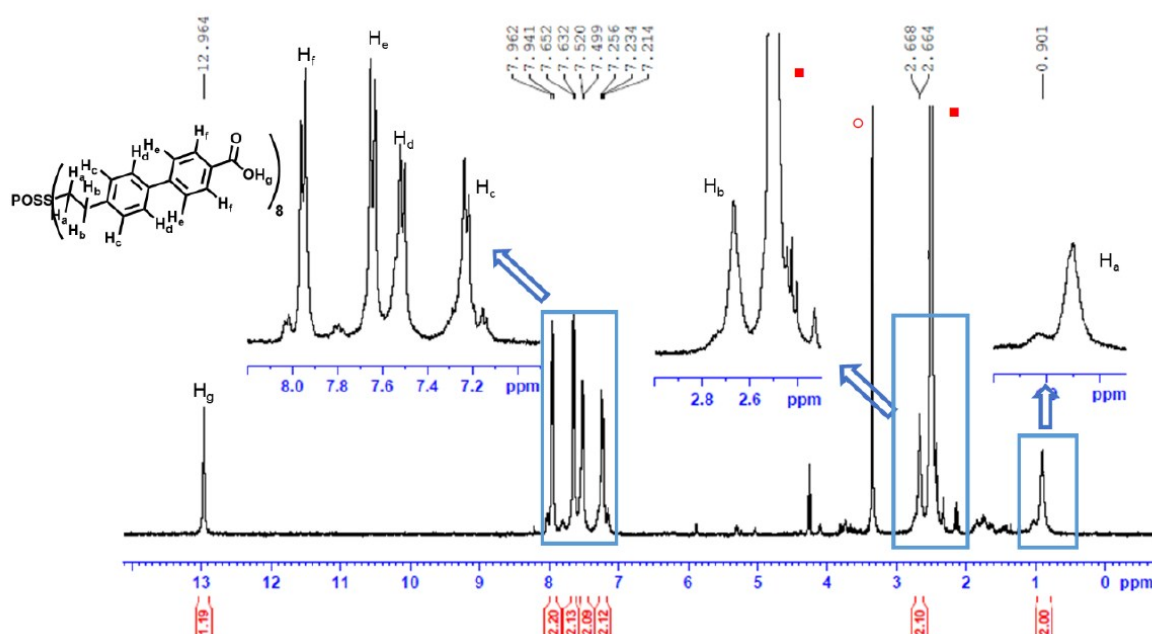

Figure S14.  $^1\text{H}$  NMR spectrum of **Octa[2-(4-carboxy-1,1'-biphenyl)ethyl] silsesquioxane** in  $\text{DMSO-d}_6$ . ■ DMSO, ○  $\text{H}_2\text{O}$

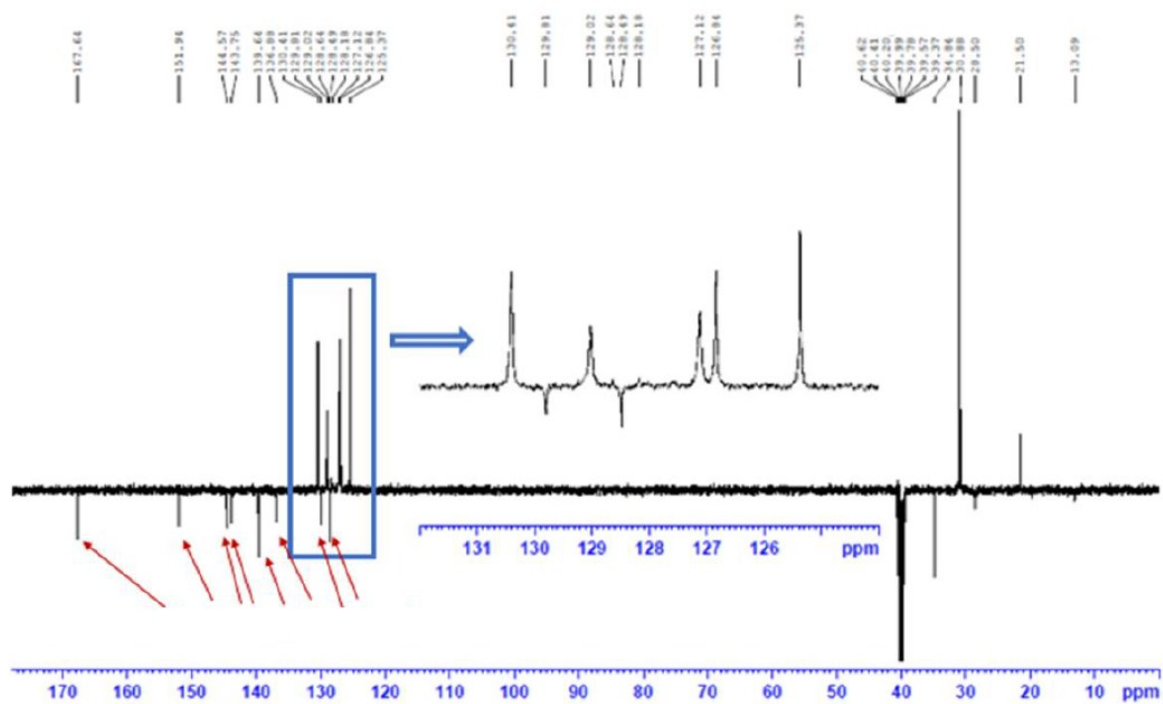

**Figure S15.**  $^{13}\text{C}$  NMR spectrum of Octa[2-(4-carboxy-1,1'-biphenyl)ethyl] silsesquioxane in DMSO- $d_6$ .

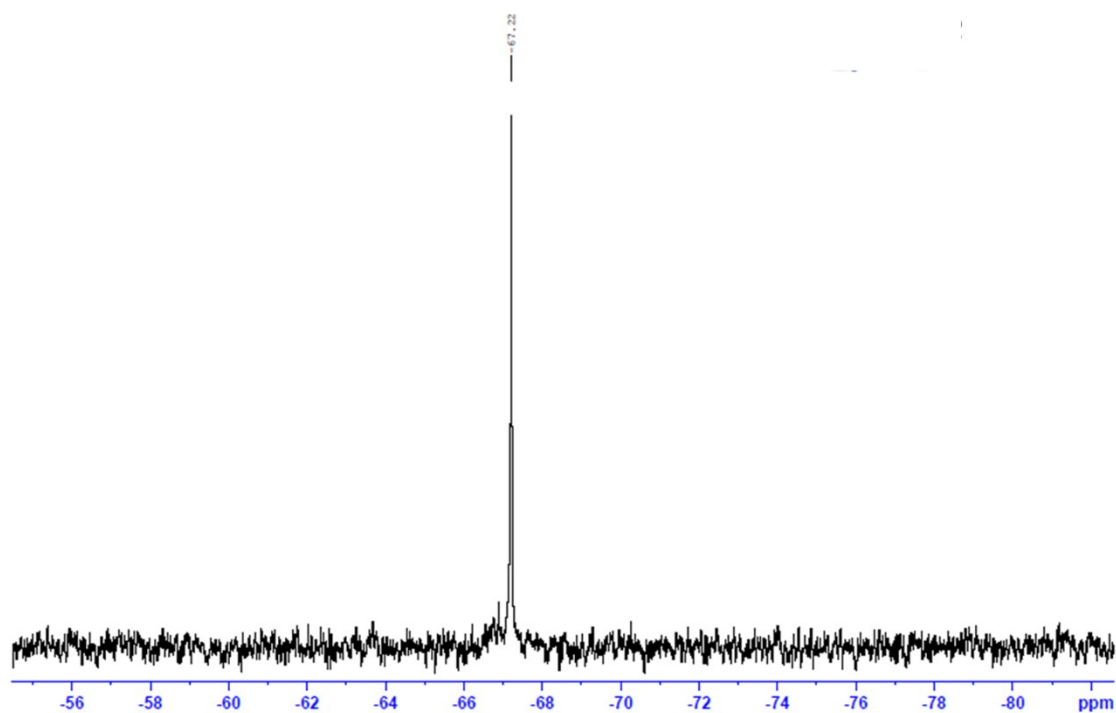

**Figure S16.**  $^{29}\text{Si}$  NMR spectrum of Octa[2-(4-carboxy-1,1'-biphenyl)ethyl] silsesquioxane in DMSO- $d_6$ .

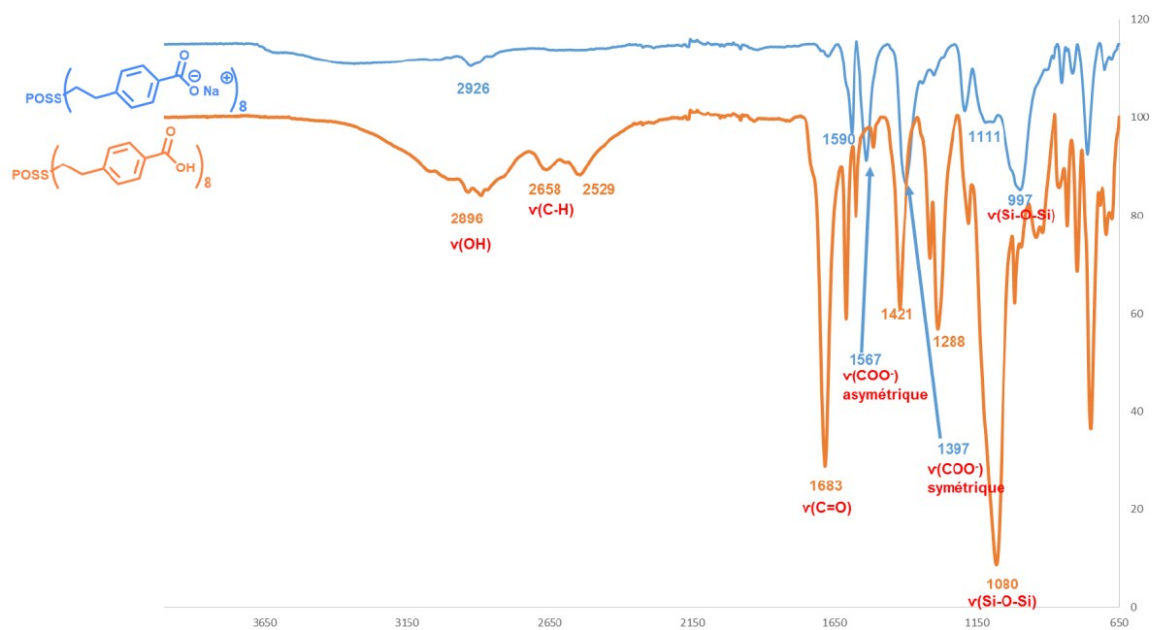

**Figure S17.** Comparison between ATR - FTIR spectra of **Octa[2-(4-carboxy-1,1'-biphenyl)ethyl] silsesquioxane** and the corresponding sodium salt.

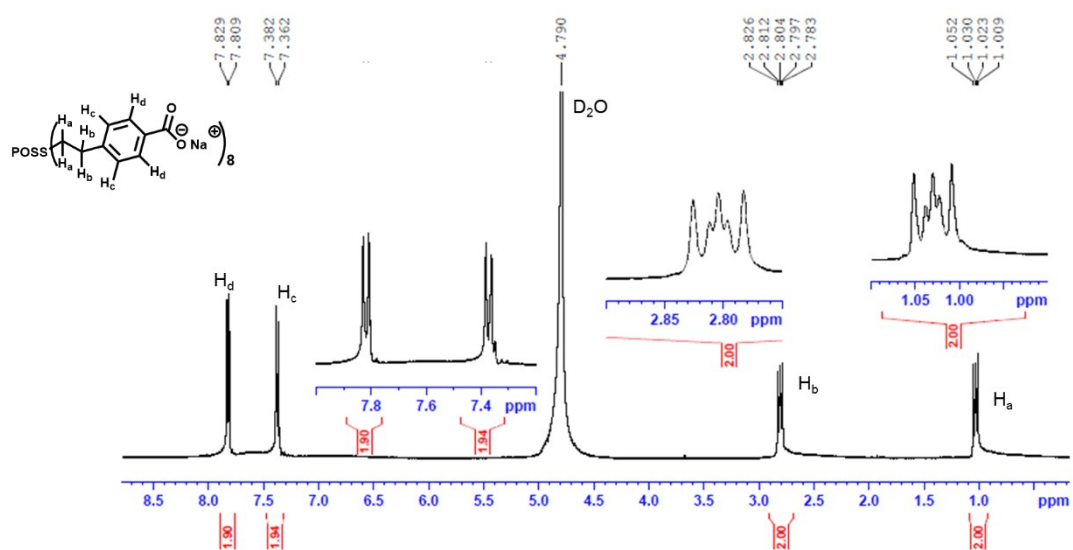

**Figure S18.**  $^1\text{H}$  NMR of spectrum of **sodium octa[2-(p-carboxylatephenyl)ethyl] silsesquioxane** in  $\text{D}_2\text{O}$ .

DV23810 A2211

*Octa[2-(p-benzyloxycarbonylphenyl)ethenyl] silsesquioxane*

5/19/2016

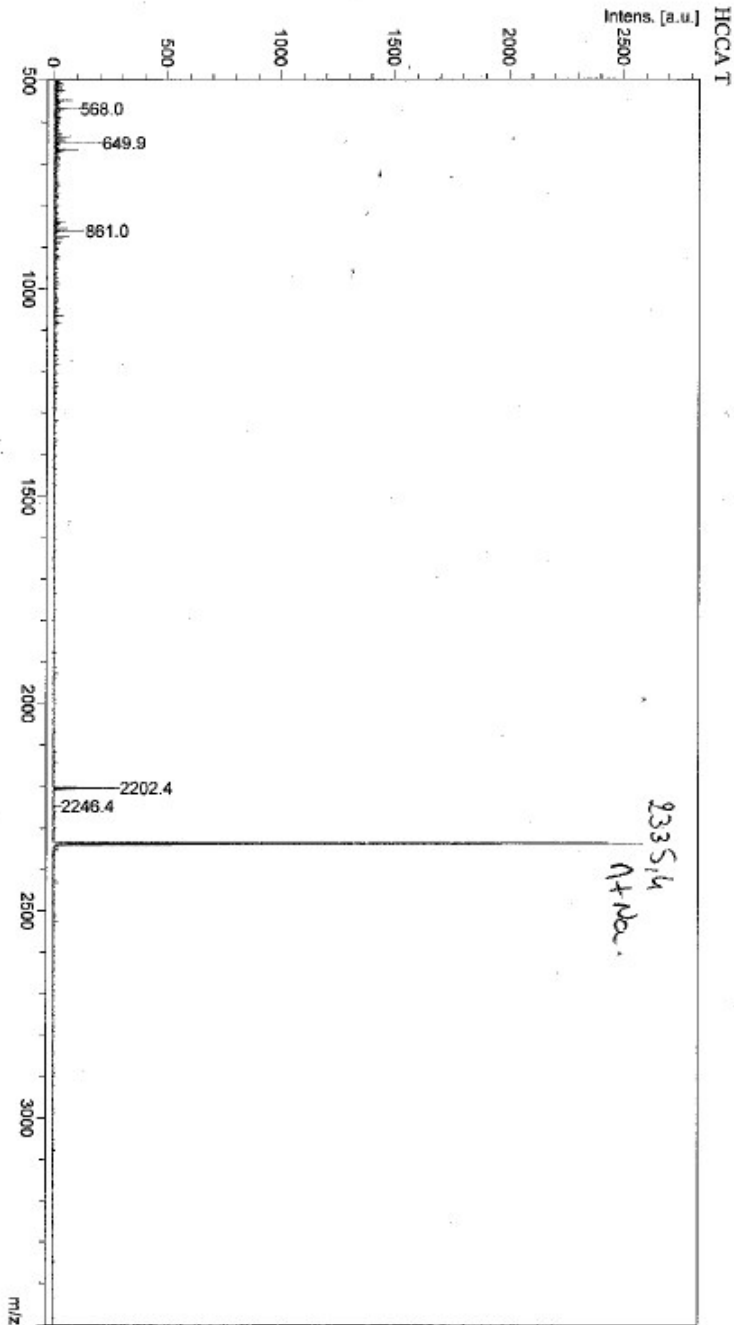

| m/z      | S/N   | Res.  | Intens. | Area |
|----------|-------|-------|---------|------|
| 568.004  | 7.8   | 11590 | 102.97  | 8    |
| 649.943  | 12.7  | 7026  | 163.40  | 25   |
| 665.940  | 7.1   | 8853  | 93.32   | 11   |
| 861.019  | 9.3   | 11835 | 112.71  | 15   |
| 2200.376 | 7.8   | 43310 | 60.17   | 10   |
| 2201.381 | 10.8  | 18108 | 99.00   | 12   |
| 2202.374 | 30.4  | 23311 | 251.23  | 80   |
| 2246.362 | 2.0   | 28823 | 18.00   | 2    |
| 2335.411 | 123.6 | 20912 | 1135.00 | 145  |
| 2337.415 | 281.7 | 19491 | 2588.00 | 384  |

**Target**  
 Target type 0209519  
 Target serial number 0005763  
 Position A22  
**Laser**  
 Laser beam attenuation 77  
 Laser beam focus 29  
 Laser repetition rate 100 Hz  
 Number of shots 400

**Spectrometer**  
 positive voltage polarity  
 PLE delay  
 Ion source voltage 1  
 Ion source voltage 2  
 Lens voltage  
 Linear detector voltage  
 Deflection on  
 Deflection mass  
 Reflector voltage 1  
 Reflector voltage 2  
 Reflector detector voltage

POS  
 30 ns  
 25 kV  
 21.99 kV  
 9.6 kV  
 1.561 kV  
 true  
 400 Da  
 26.3 kV  
 13.8 kV  
 1.667 kV

**Instrument**  
 Instrument type  
 Serial instrument number  
 Name of computer  
 Operator ID or name  
 flexControl version  
 flexAnalysis version  
 ultraflexTOF/TOF  
 247420.0001  
 4AP02  
 BDAL@DE  
 flexControl 3.3.108.0

Figure S19. MALDI-TOF mass spectroscopy spectrum in positive ionisation of Octa[2-(p-benzyloxycarbonylphenyl)ethenyl] silsesquioxane.

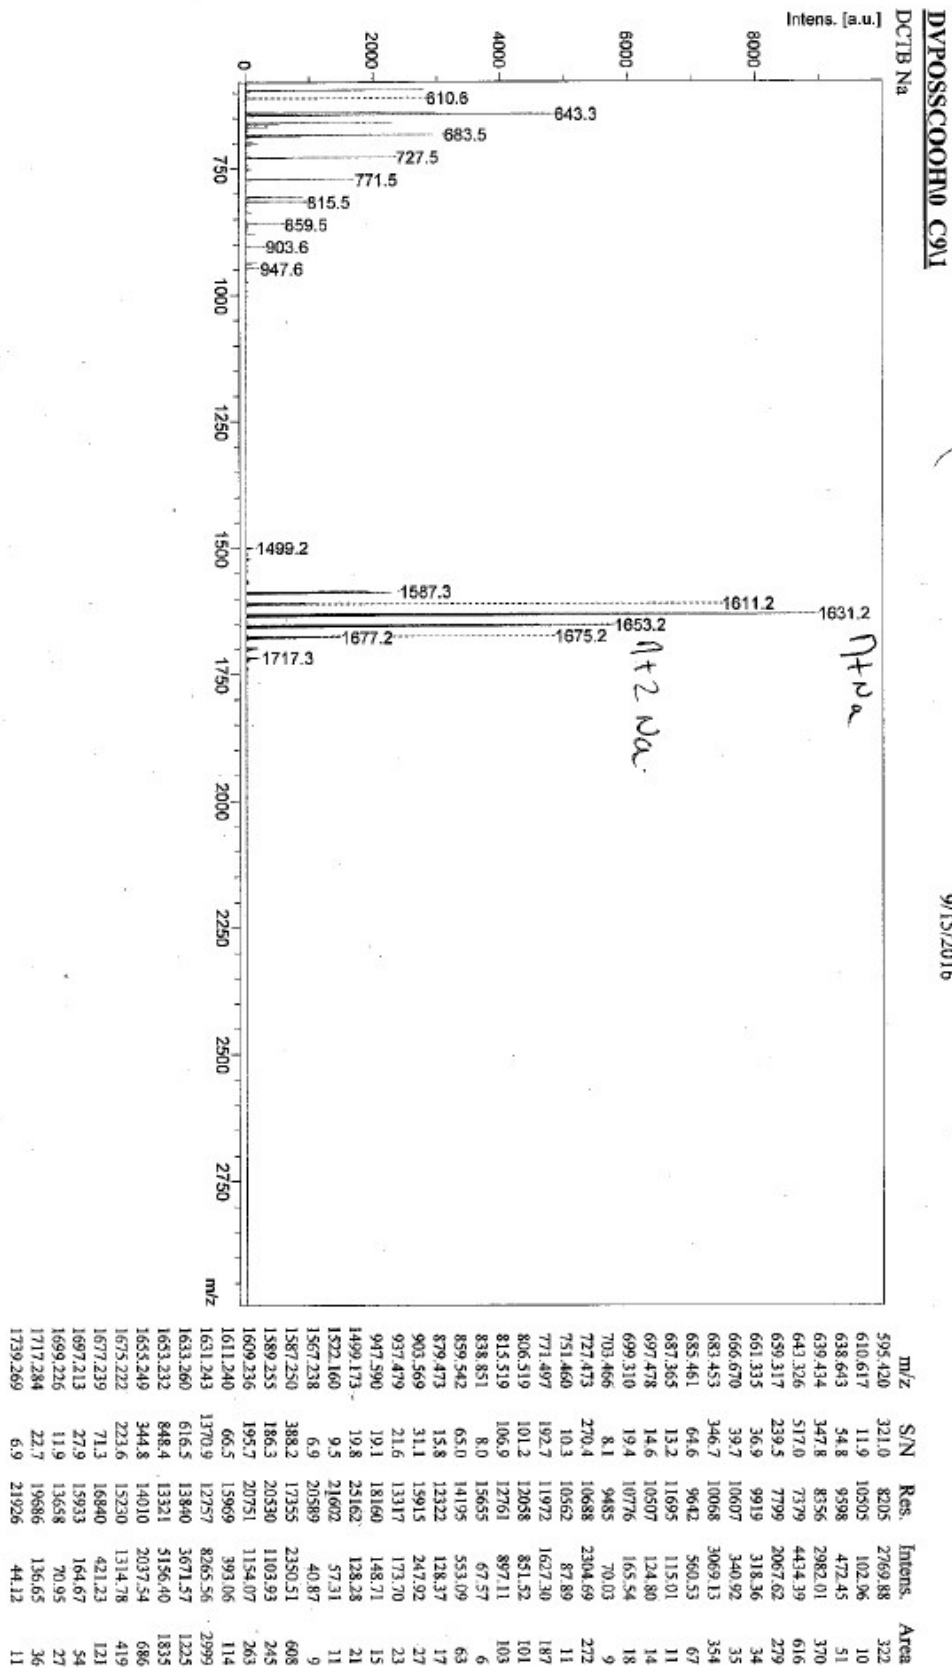

**Figure S20.** MALDI-TOF mass spectroscopy spectrum in positive ionisation of Octa[2-(p-carboxyphenyl)ethyl] silsesquioxane.

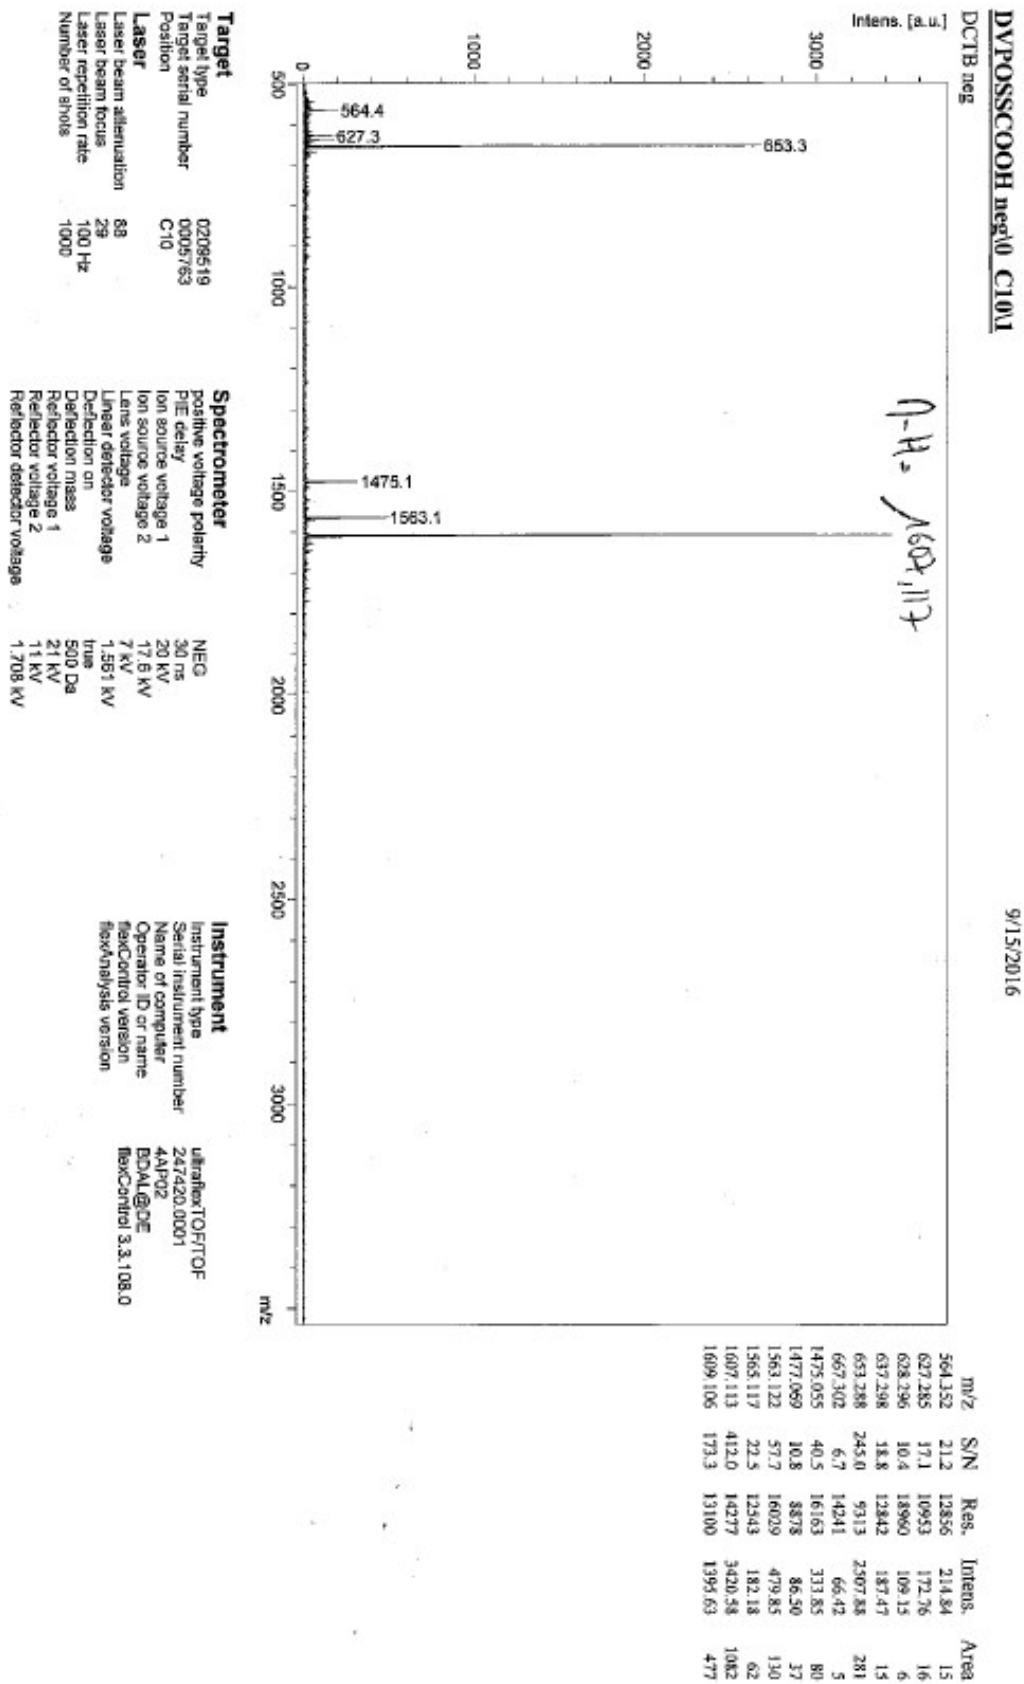

Figure S21. MALDI-TOF mass spectroscopy spectrum in negative ionisation of Octa[2-(p-carboxyphenyl)ethyl] silsesquioxane.

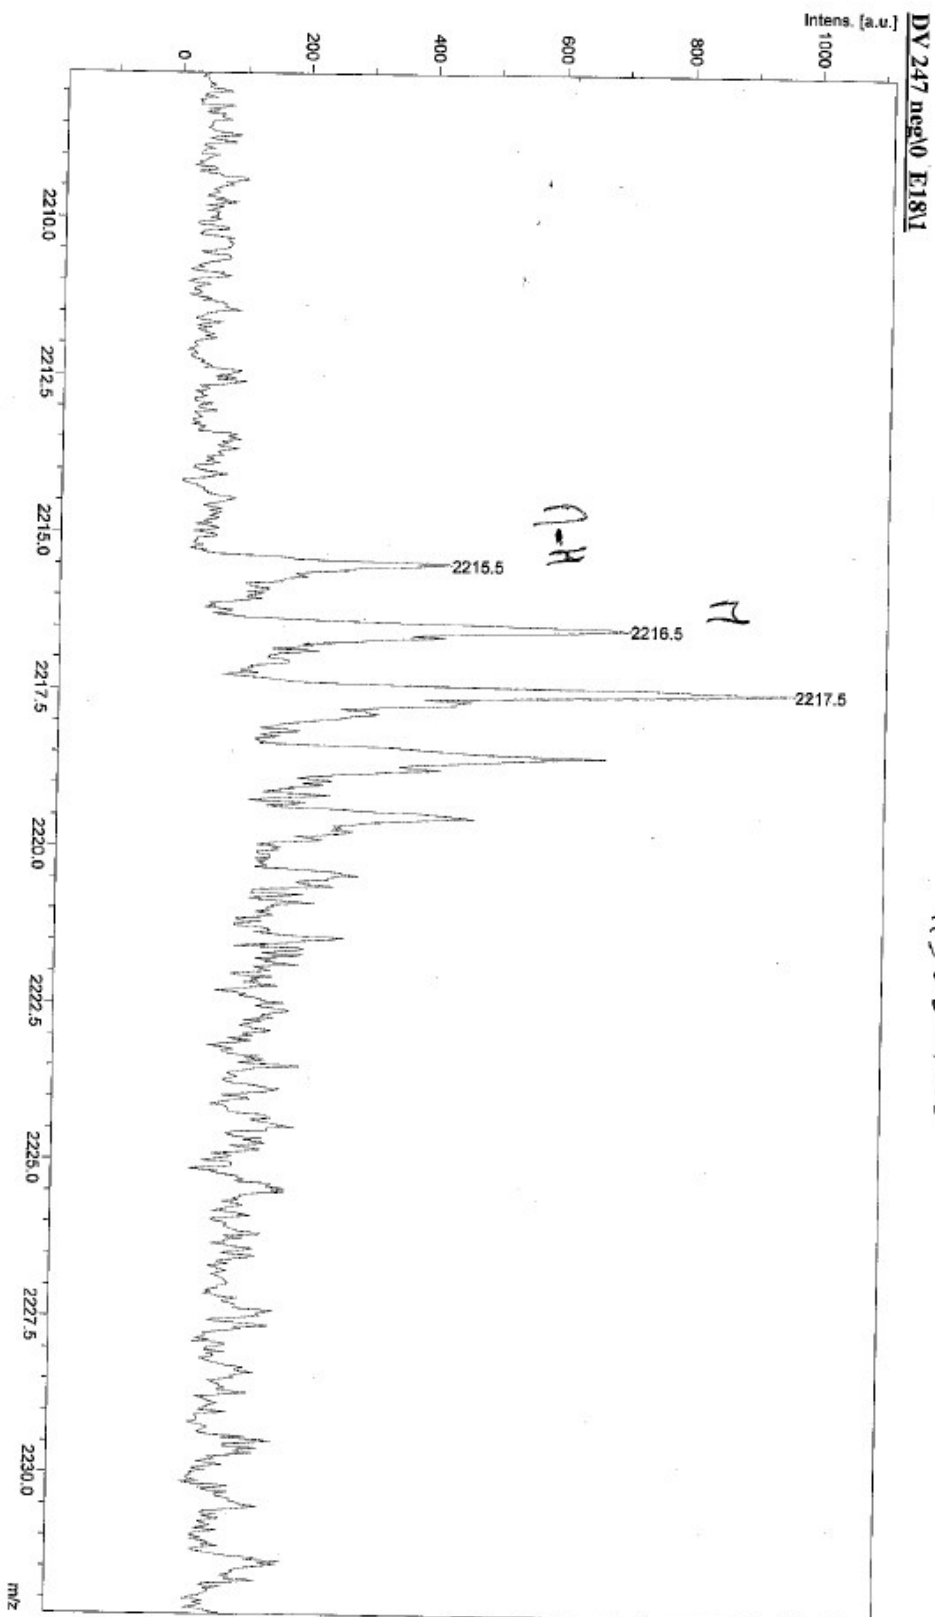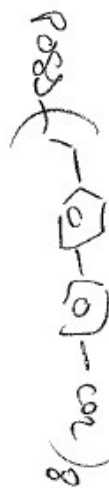

$$n = 2216, 49$$

**Figure S22.** MALDI-TOF mass spectroscopy spectrum in negative ionisation of **Octa[2-(4-carboxy-1,1'-biphenyl)ethyl] silsesquioxane.**

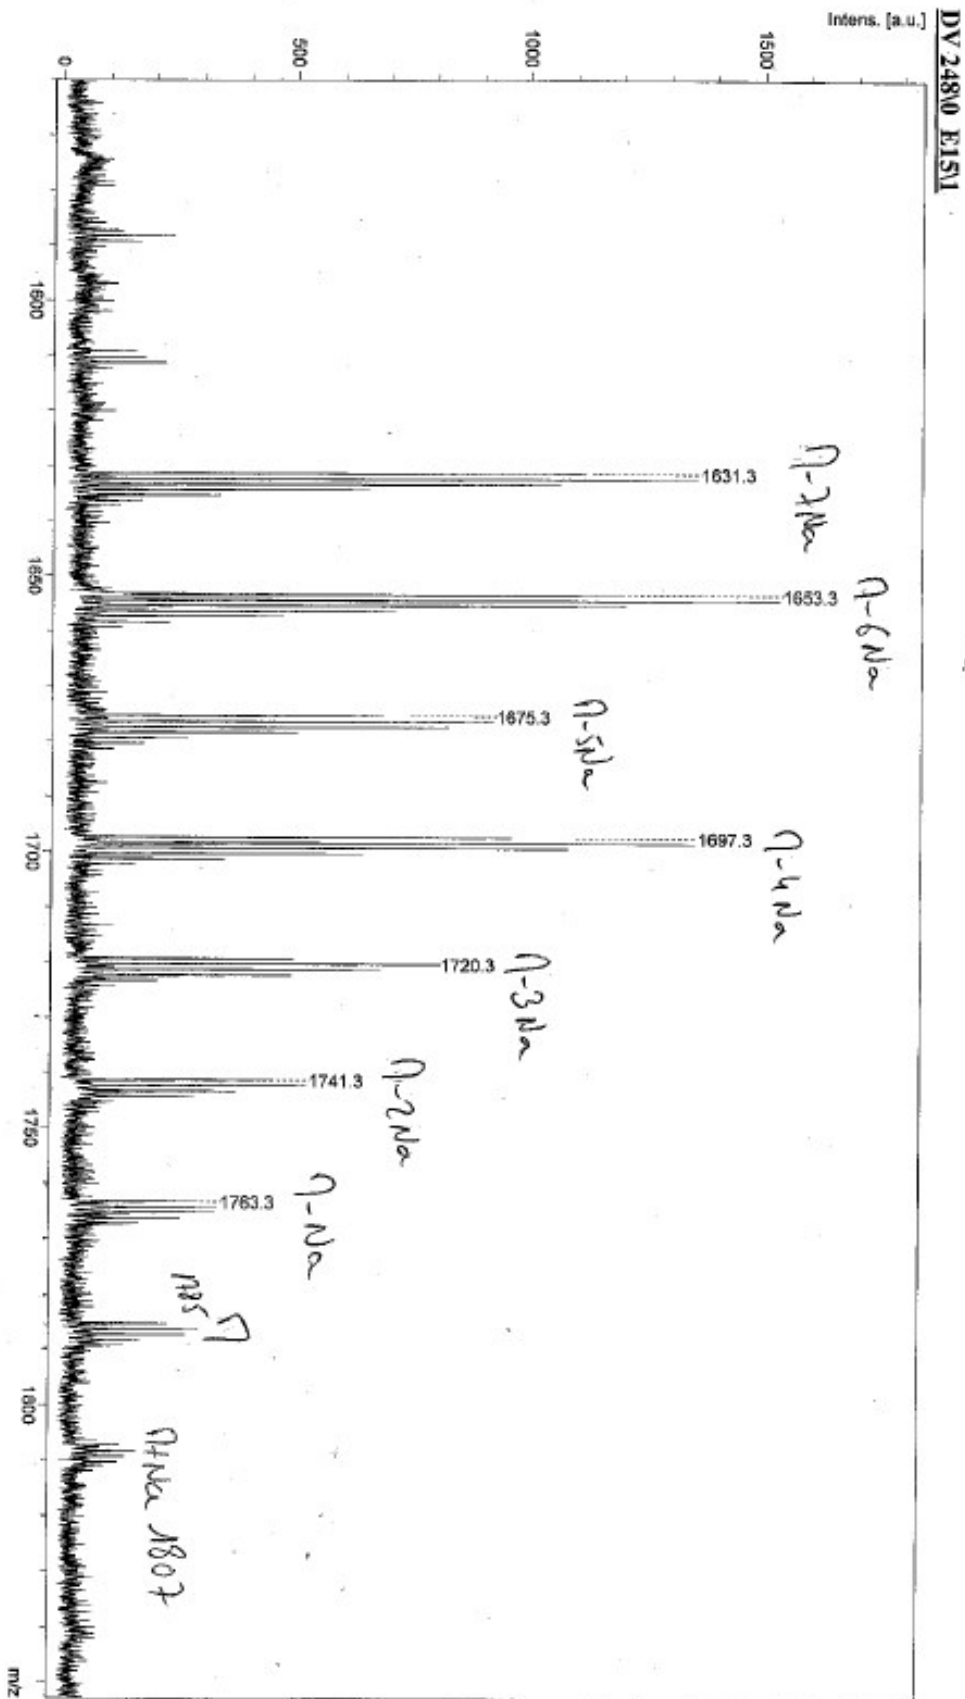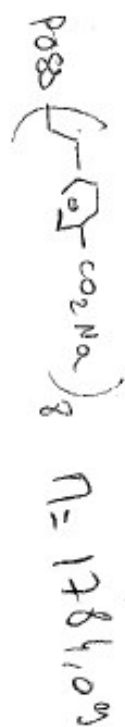

Figure S23. MALDI-TOF mass spectroscopy spectrum of sodium octa[2-(p-carboxylatephenyl)ethyl] silsesquioxane.
